# Supplementary material for: Impact of geography and surgical approach on recurrence in global pilonidal sinus disease
Source: PubMed Central journal article supplement (PMC6805955; doi:10.1038/s41598-019-51159-z), 2019-10-22
Supplement: 41598_2019_51159_MOESM1_ESM.pdf [file 41598_2019_51159_MOESM1_ESM.pdf]

Doll D, Orlik A, Maier K, Kauf P, Schmid M, Diekmann M, Vogt AP,  
Stauffer VK, Luedi MM:

*Impact of geography and surgical approach on  
recurrence in global pilonidal sinus disease*

Supplemental Figures and Tables

### Australia/New Zealand

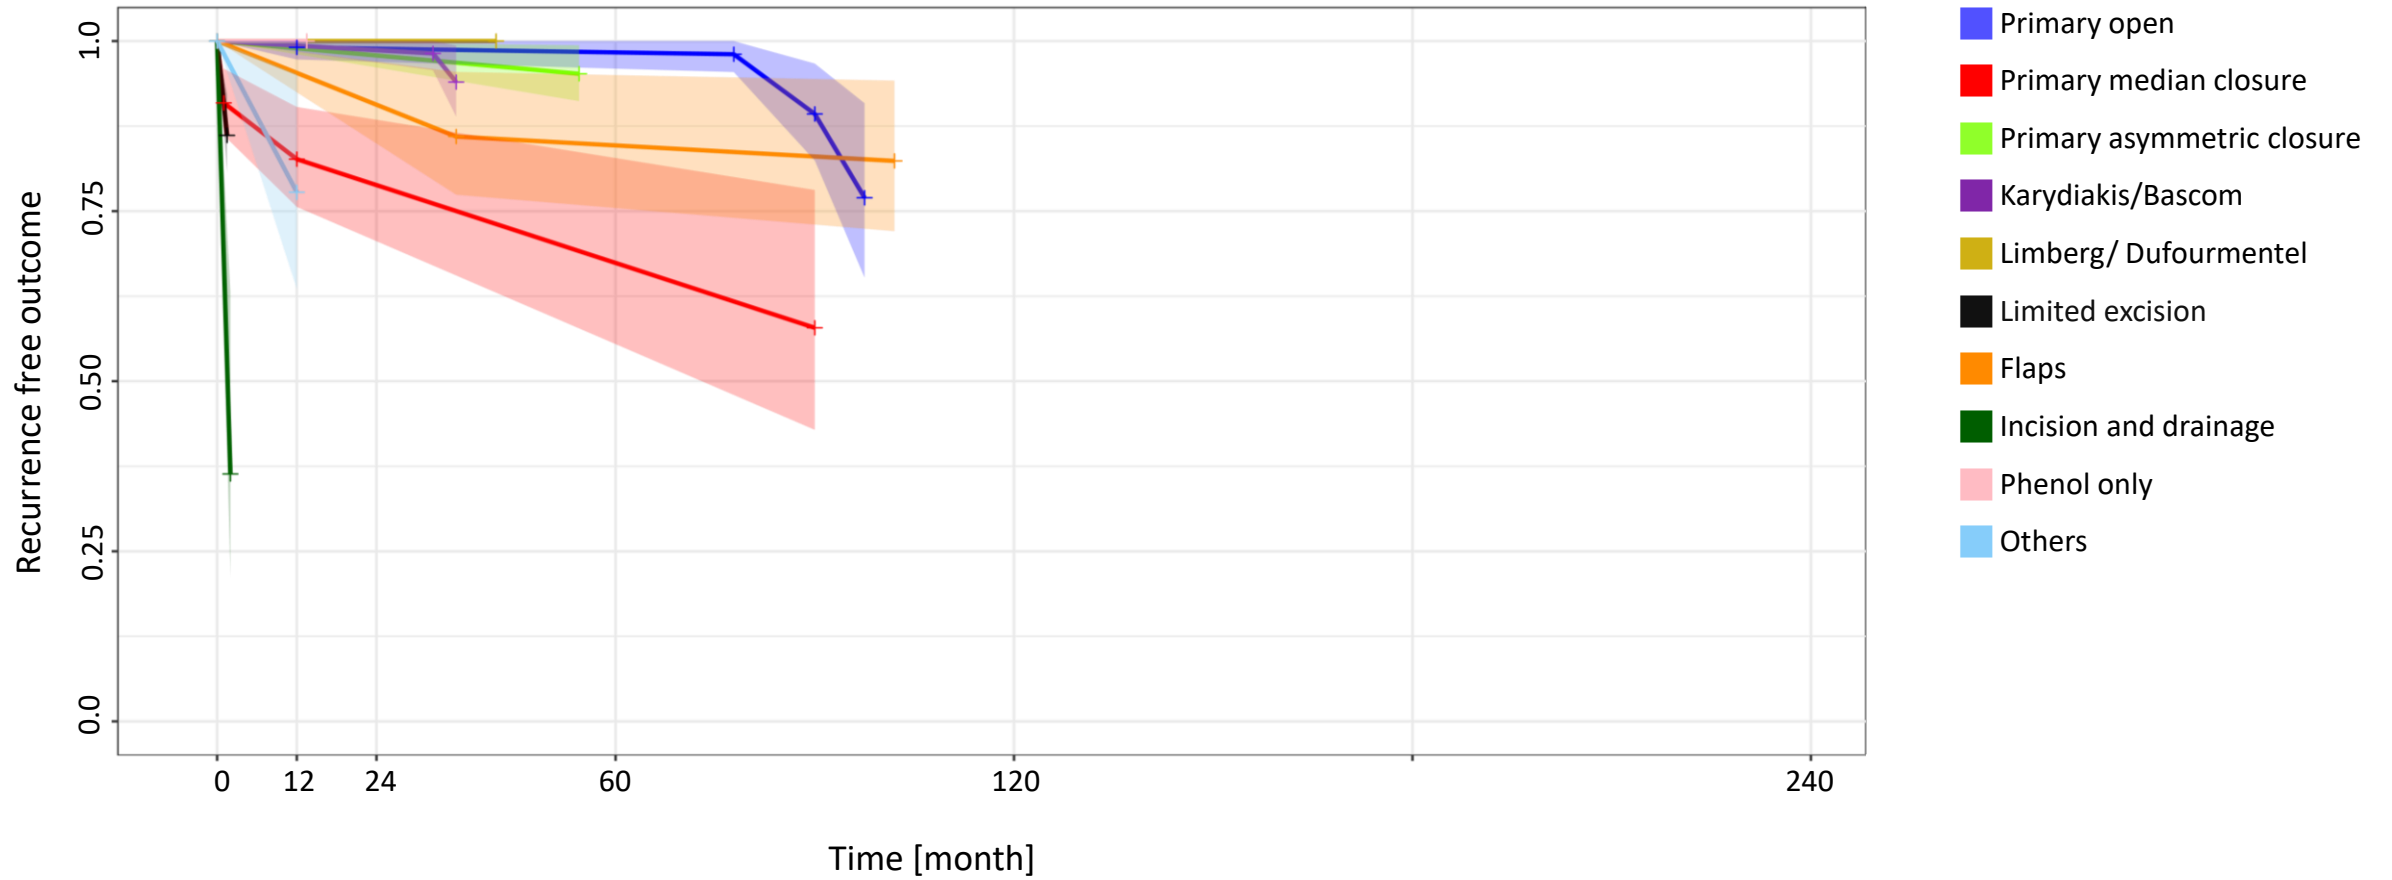

**Supplemental Figure 1. Australia / New Zealand:** Kaplan-Meier estimator depicting recurrence-free outcome of the study population as a function of follow-up time. The data used include all available studies from Italy. 95% confidence intervals are shown by shaded lines. Number of patients and CI 95% data included in the analysis are shown in Supplemental Table 1. Shaded lines indicate 95% confidence intervals

**Supplemental Table 1:** Recurrence rates in percent as a function of follow-up time of patients and all available surgical approaches applied in Australia and New Zealand. Number of patients included in the analysis and the according 95% CI are indicated at 0, 12, 24, 60, and 120 months. All used citations for the analysis are shown in the right column.

| <b>Australia + New Zealand</b>                   | <b>12 months</b>        |                    | <b>24 months</b>        |                    | <b>60 months</b>        |                    | <b>120 months</b>       |                    | <b>Citations</b> |
|--------------------------------------------------|-------------------------|--------------------|-------------------------|--------------------|-------------------------|--------------------|-------------------------|--------------------|------------------|
| <b>Surgical method (total patients included)</b> | <b>RR in % (95% CI)</b> | <b>Nr. at risk</b> | <b>RR in % (95% CI)</b> | <b>Nr. at risk</b> | <b>RR in % (95% CI)</b> | <b>Nr. at risk</b> | <b>RR in % (95% CI)</b> | <b>Nr. at risk</b> |                  |
| Primary open (108)                               | 0.9 (0.0-2.8)           | 108                | 1.1* (0.0-3.1)          | 106*               | 1.7* (0.0-4.2)          | 101*               | NA                      | NA                 | 114,624,625      |
| Primary median closure (132)                     | 17.4 (8.3-26.4)         | 77                 | 21.2* (8.8-33.6)        | 68*                | 32.6* (10.3-55.0)       | 42*                | NA                      | NA                 | 205,624,625      |
| Primary asymmetric closure (104)                 | 1.1* (0.1-2.0)          | 104*               | 2.1* (0.2-4.1)          | 104*               | NA                      | NA                 | NA                      | NA                 | 242              |
| Karydiakis/Bascom (110)                          | 0.7* (0.0-1.6)          | 110*               | 1.3* (0.0-3.3)          | 110*               | NA                      | NA                 | NA                      | NA                 | 270,626          |
| Limberg/Dufourmentel (29)                        | 0.0* (0.0-0.0)          | 29*                | 0.0* (0.0-0.0)          | 29*                | NA                      | NA                 | NA                      | NA                 | 627              |
| Limited excision (137)                           | NA                      | NA                 | NA                      | NA                 | NA                      | NA                 | NA                      | NA                 | 205              |
| Flaps (57)                                       | 4.7* (1.1-8.2)          | 57*                | 9.4* (2.2-16.5)         | 57*                | 15.3* (3.6-27.1)        | 45*                | NA                      | NA                 | 460,628          |
| Incision and drainage (22)                       | NA                      | NA                 | NA                      | NA                 | NA                      | NA                 | NA                      | NA                 | 205              |
| Phenol only (20)                                 | 0.0* (0.0-0.0)          | 20*                | NA                      | NA                 | NA                      | NA                 | NA                      | NA                 | 629              |
| Others (27)                                      | 22.2 (1.6-42.8)         | 27                 | NA                      | NA                 | NA                      | NA                 | NA                      | NA                 | 625              |

# Asia

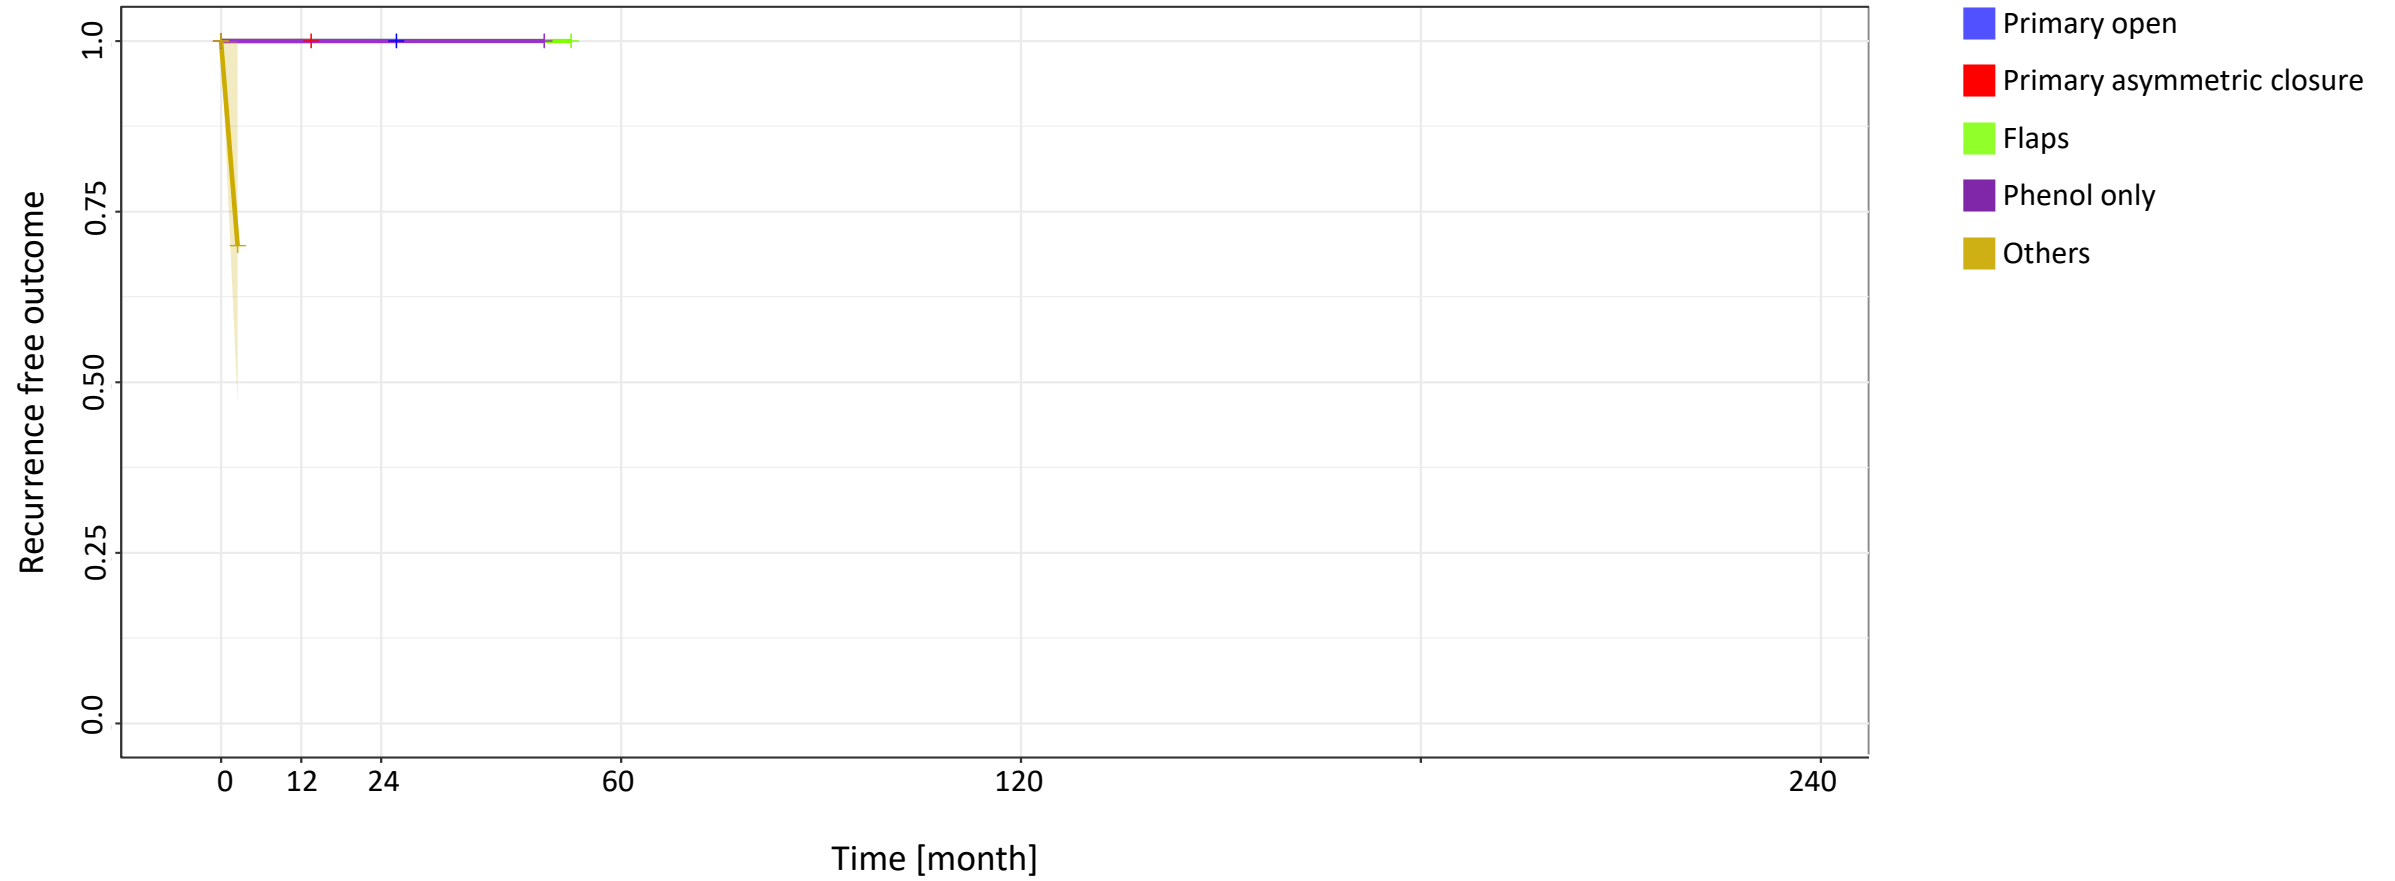

**Supplemental Figure 2. Asia:** Kaplan-Meier estimator depicting recurrence-free outcome of the study population as a function of follow-up time. The data used include all available studies from Italy. 95% confidence intervals are shown by shaded lines. Number of patients and CI 95% data included in the analysis are shown in Supplemental Table 2. Shaded lines indicate 95% confidence intervals



### Greece

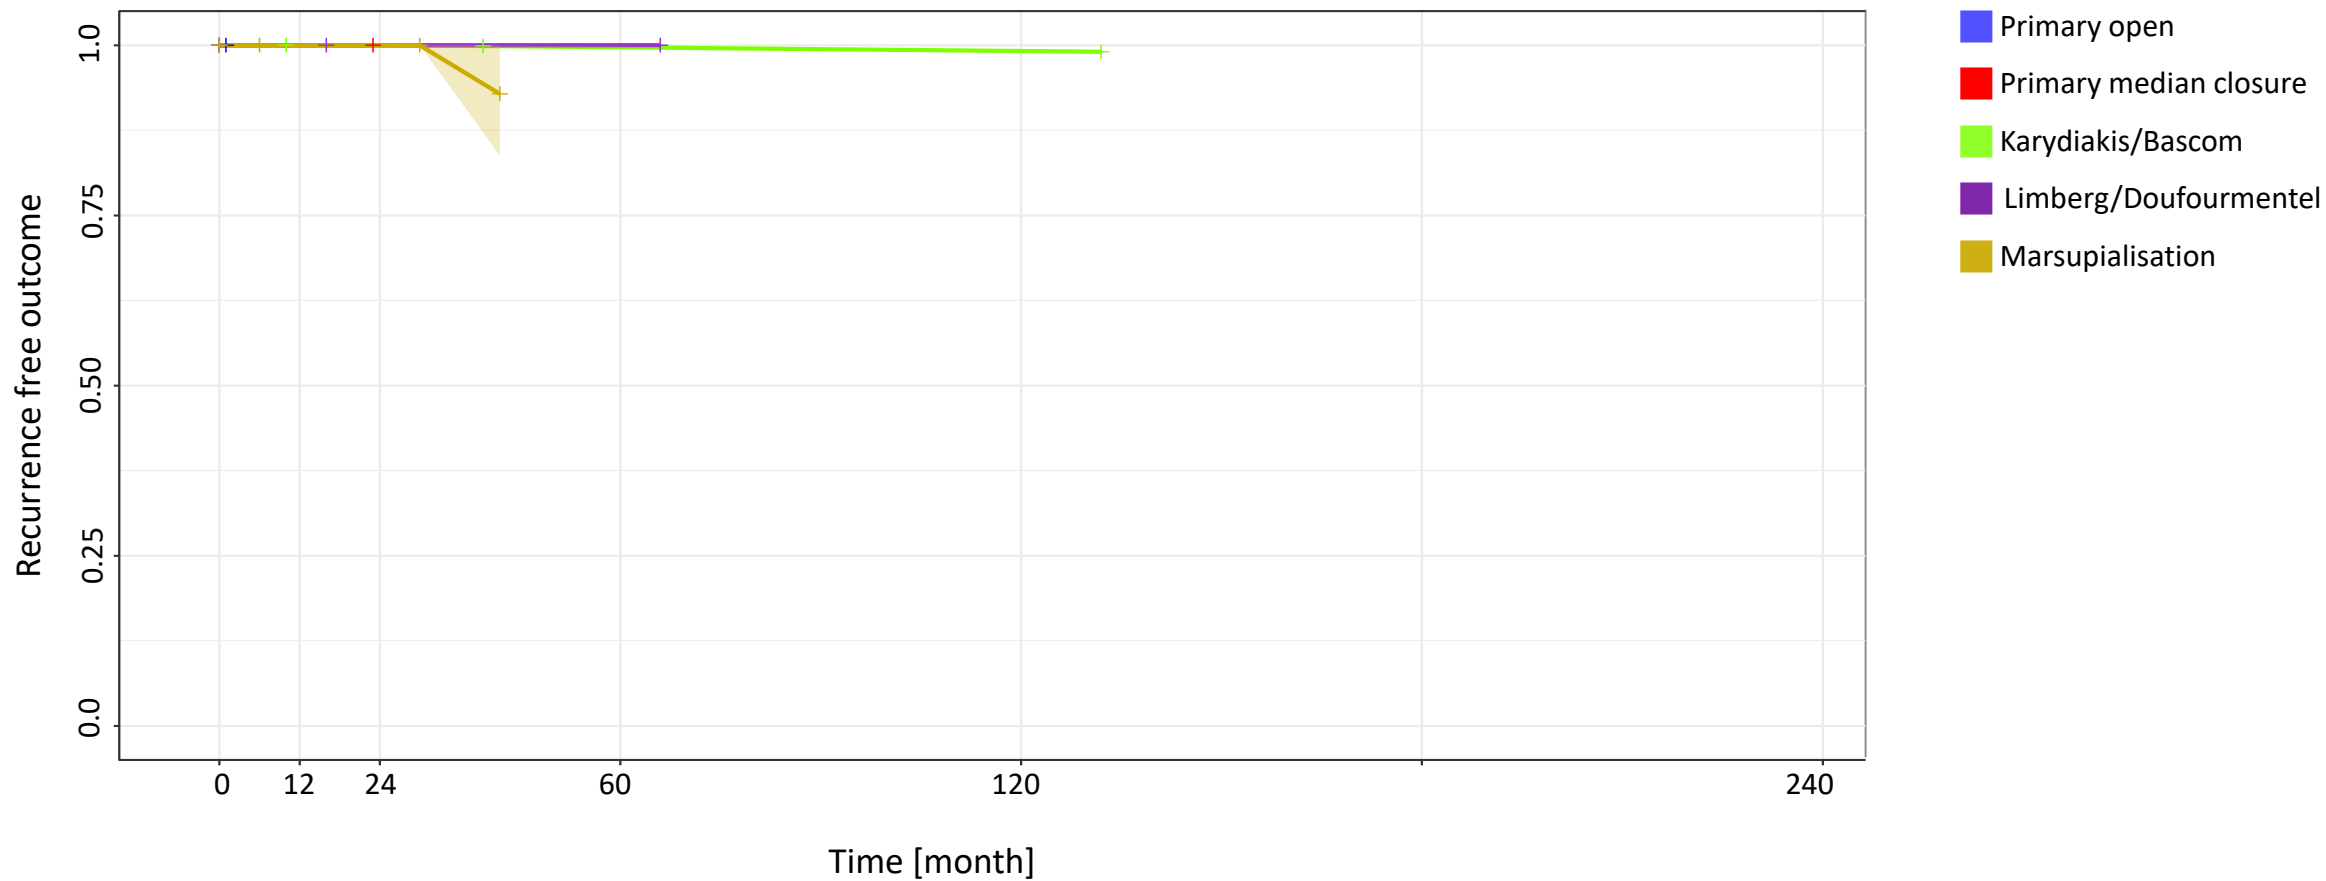

**Supplemental Figure 3. Greece:** Kaplan-Meier estimator depicting recurrence-free outcome of the study population as a function of follow-up time. The data used include all available studies from Italy. 95% confidence intervals are shown by shaded lines. Number of patients and CI 95% data included in the analysis are shown in Supplemental Table 3.

| <b>Supplemental Table 3:</b> Recurrence rates in percent as a function of follow-up time of patients and all available surgical approaches applied in Greece. Number of patients included in the analysis and the according 95% CI are indicated at 0, 12, 24, 60, and 120 months. All used citations for the analysis are shown in the right column |                         |                    |                         |                    |                         |                    |                         |                    |                  |
|------------------------------------------------------------------------------------------------------------------------------------------------------------------------------------------------------------------------------------------------------------------------------------------------------------------------------------------------------|-------------------------|--------------------|-------------------------|--------------------|-------------------------|--------------------|-------------------------|--------------------|------------------|
| <b>Greece</b>                                                                                                                                                                                                                                                                                                                                        | <b>12 months</b>        |                    | <b>24 months</b>        |                    | <b>60 months</b>        |                    | <b>120 months</b>       |                    | <b>Citations</b> |
| <b>Surgical method (total patients included)</b>                                                                                                                                                                                                                                                                                                     | <b>RR in % (95% CI)</b> | <b>Nr. at risk</b> | <b>RR in % (95% CI)</b> | <b>Nr. at risk</b> | <b>RR in % (95% CI)</b> | <b>Nr. at risk</b> | <b>RR in % (95% CI)</b> | <b>Nr. at risk</b> |                  |
| Primary open (52)                                                                                                                                                                                                                                                                                                                                    | NA                      | NA                 | NA                      | NA                 | NA                      | NA                 | NA                      | NA                 | 40               |
| Primary median closure (43)                                                                                                                                                                                                                                                                                                                          | 0.0* (0.0-0.0)          | 43*                | NA                      | NA                 | NA                      | NA                 | NA                      | NA                 | 631              |
| Karydiakis/Bascom (7240)                                                                                                                                                                                                                                                                                                                             | 0.0* (0.0-0.0)          | 7238*              | 0.1* (0.0-0.1)          | 7229*              | 0.3* (0.2-0.4)          | 7067*              | 0.9* (0.6-1.1)          | NA                 | 278,632,633      |
| Limberg/Dufourmentel (142)                                                                                                                                                                                                                                                                                                                           | 0.0* (0.0-0.0)          | 142*               | 0.0* (0.0-0.0)          | 137*               | 0.0* (0.0-0.0)          | 114*               | NA                      | NA                 | 364,634          |
| Marsupialisation (77)                                                                                                                                                                                                                                                                                                                                | 0.0* (0.0-0.0)          | 77                 | 0.0* (0.0-0.0)          | 55*                | NA                      | NA                 | NA                      | NA                 | 408,635          |
